# Supplementary material
Source: ML conference proceedings conference paper supplement (https://proceedings.mlr.press/v89/li19d.html)
Supplement: Supplementary file 1 [file li19d-supp.pdf]

## Supplementary Document for “Bandit Online Learning with Unknown Delays”

### A Real to virtual slot mapping

For the analysis, let  $t(\tau)$  denote the real slot when the real loss  $l_{t(\tau)}$  corresponding to  $\tilde{l}_\tau$  was incurred, i.e.,  $\tilde{l}_\tau = \hat{l}_{t(\tau)|t(\tau)+d_{t(\tau)}}$ . Also define an auxiliary variable  $\tilde{s}_\tau = \tau - 1 - L_{t(\tau)-1}$ . See an example in Fig. 6 and Table 1.

**Lemma 6.** *The following relations hold: i)  $\tilde{s}_\tau \geq 0, \forall \tau$ ; ii)  $\sum_{\tau=1}^T \tilde{s}_\tau = \sum_{t=1}^T d_t$ ; and, iii) if  $\max_t d_t \leq \bar{d}$ , we have  $\tilde{s}_\tau \leq 2\bar{d}, \forall \tau$ .*

*Proof.* We first prove the property i)  $\tilde{s}_\tau \geq 0, \forall t$ . Consider at virtual slot  $\tau$ , the observed loss is  $l_{t(\tau)}(a_{t(\tau)})$  with corresponding  $\tilde{s}_\tau = \tau - 1 - L_{t(\tau)-1}$ . Suppose that  $L_{t(\tau)-1} = m$ , where  $0 \leq m \leq t(\tau) - 1$  (by definition of  $L_{t(\tau)-1}$ ). The history  $L_{t(\tau)-1} = m$  suggests that at the beginning of  $t_1 = t(\tau)$ , the number of received feedback is  $m$ . On the other hand, the loss  $l_{t(\tau)}(a_{t(\tau)})$  is observed at the end of slot  $t_2 = t(\tau) + d_{t(\tau)} \geq t_1$ , thus at the beginning of  $t_2$ , there are at least  $m$  observations. Hence we must have  $\tau \geq m + 1$ . Then by the definition,  $\tilde{s}_\tau \geq m + 1 - 1 - m = 0$ .

Then for the property ii)  $\sum_{\tau=1}^T \tilde{s}_\tau = \sum_{t=1}^T d_t$ , the proof follows from the definition of  $\tilde{s}_\tau$ , i.e.,

$$\begin{aligned} \sum_{\tau=1}^T \tilde{s}_\tau &= \sum_{\tau=1}^T (\tau - 1 - L_{t(\tau)-1}) = \sum_{t=1}^T (t - 1) - \sum_{\tau=1}^T L_{t(\tau)-1} \\ &\stackrel{(a)}{=} \sum_{t=1}^T (t - 1 - L_{t-1}) \stackrel{(b)}{=} \sum_{t=1}^T d_t \end{aligned} \quad (20)$$

where (a) is due to the fact that  $\{t(\tau)\}_{\tau=1}^T$  is a permutation of  $\{1, \dots, T\}$ ; and (b) follows from the definition of  $L_{t-1}$ .

Finally, for property iii), notice that  $L_{t(\tau)-1} \geq t(\tau) - 1 - \bar{d}$ , which follows that at the beginning of  $t = t(\tau)$ , the losses of slots  $t \leq t(\tau) - 1 - \bar{d}$  must have been received. Therefore, we have

$$\tilde{s}_\tau = \tau - 1 - L_{t(\tau)-1} \leq \tau - 1 - t(\tau) + 1 + \bar{d} \stackrel{(c)}{\leq} 2\bar{d} \quad (21)$$

where (c) follows from that  $l_{t(\tau)}(a_{t(\tau)})$  is observed at the end of  $t = t(\tau) + d_{t(\tau)}$ , and  $L_{t(\tau)+d_{t(\tau)}-1}$  is at most  $t(\tau) + d_{t(\tau)} - 2$  (since  $l_{t(\tau)}(a_{t(\tau)})$  is not observed), leading to the fact that  $\tau$  is at most  $t(\tau) + d_{t(\tau)}$ , and thus  $\tau - t(\tau) \leq d_{t(\tau)} \leq \bar{d}$ .  $\square$

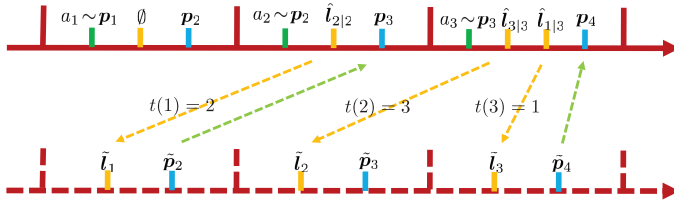

**Figure 6:** An example of mapping from real slots (solid line) to virtual slots (dotted line). The value of  $t(\tau)$  is marked beside the corresponding yellow arrow. In the example, we consider  $T = 3$  with delay  $d_1 = 2$ ,  $d_2 = 0$ , and  $d_3 = 0$ .

**Table 1:** The Value of  $t(\tau)$ ,  $L_{t(\tau)-1}$ , and  $\tilde{s}_\tau$  in Fig. 6.

| Virtual slot     | $\tau = 1$ | $\tau = 2$ | $\tau = 3$ |
|------------------|------------|------------|------------|
| $t(\tau)$        | 2          | 3          | 1          |
| $L_{t(\tau)-1}$  | 0          | 1          | 0          |
| $\tilde{s}_\tau$ | 0          | 0          | 2          |

### B Proofs for DEXP3

Before diving into the proofs, we first show some useful yet simple bounds for different parameters of the DEXP3's (in virtual slots). In virtual slot  $\tau$ , the update is carried out the same as (6), (7) and (8), given by

$$\tilde{w}_{\tau+1}(k) = \tilde{p}_\tau(k) \exp \left[ -\eta \min \{ \delta_1, \tilde{l}_\tau(k) \} \right], \forall k, \quad (22)$$

$$w_{\tau+1}(k) = \max \left\{ \frac{\tilde{w}_{\tau+1}(k)}{\sum_{j=1}^K \tilde{w}_{\tau+1}(j)}, \frac{\delta_2}{K} \right\}, \forall k, \quad (23)$$

$$\tilde{p}_{\tau+1}(k) = \frac{w_{\tau+1}(k)}{\sum_{j=1}^K w_{\tau+1}(j)}, \forall k. \quad (24)$$

Since  $\tilde{l}_\tau(k) \geq 0, \forall k, \tau$ , we have

$$\sum_{j=1}^K \tilde{w}_\tau(j) \leq \sum_{j=1}^K \tilde{p}_{\tau-1}(j) = 1. \quad (25)$$

And  $\sum_{k=1}^K w_\tau(k)$  is bounded by

$$\sum_{k=1}^K w_\tau(k) \geq \sum_{k=1}^K \frac{\tilde{w}_\tau(k)}{\sum_{j=1}^K \tilde{w}_\tau(j)} = 1; \quad (26)$$

$$\sum_{k=1}^K w_\tau(k) \leq \sum_{k=1}^K \frac{\tilde{w}_\tau(k)}{\sum_{j=1}^K \tilde{w}_\tau(j)} + \delta_2 = 1 + \delta_2. \quad (27)$$

Finally,  $\tilde{p}_\tau(k)$  is bounded by

$$\frac{\delta_2}{K(1 + \delta_2)} \leq \frac{w_\tau(k)}{1 + \delta_2} \leq \tilde{p}_\tau(k) \leq w_\tau(k). \quad (28)$$

## B.1 Proof of Lemma 1

**Lemma 7.** *In consecutive virtual slots  $\tau - 1$  and  $\tau$ , the following inequality holds for any  $k$ .*

$$\tilde{p}_{\tau-1}(k) - \tilde{p}_\tau(k) \leq \tilde{p}_{\tau-1}(k) \frac{\delta_2 + \eta \min \{\delta_1, \tilde{l}_{\tau-1}(k)\}}{1 + \delta_2}. \quad (29)$$

*Proof.* First, we have

$$\tilde{p}_\tau(k) \stackrel{(a)}{\geq} \frac{w_\tau(k)}{1 + \delta_2} \geq \frac{\tilde{w}_\tau(k)}{\sum_{j=1}^K \tilde{w}_\tau(j)(1 + \delta_2)} \stackrel{(b)}{\geq} \frac{\tilde{w}_\tau(k)}{1 + \delta_2} = \frac{\tilde{p}_{\tau-1}(k) \exp \left[ -\eta \min \{\delta_1, \tilde{l}_{\tau-1}(k)\} \right]}{1 + \delta_2} \quad (30)$$

where (a) is the result of (28); (b) is due to (25). Hence, we have

$$\begin{aligned} \tilde{p}_\tau(k) - \tilde{p}_{\tau-1}(k) &\geq \frac{\tilde{p}_{\tau-1}(k) \exp \left[ -\eta \min \{\delta_1, \tilde{l}_{\tau-1}(k)\} \right]}{1 + \delta_2} - \tilde{p}_{\tau-1}(k) \\ &\stackrel{(c)}{\geq} \frac{\tilde{p}_{\tau-1}(k)}{1 + \delta_2} \left[ 1 - \eta \min \{\delta_1, \tilde{l}_{\tau-1}(k)\} \right] - \tilde{p}_{\tau-1}(k) \\ &= \tilde{p}_{\tau-1}(k) \frac{-\delta_2 - \eta \min \{\delta_1, \tilde{l}_{\tau-1}(k)\}}{1 + \delta_2} \end{aligned} \quad (31)$$

where (c) follows from  $e^{-x} \geq 1 - x$  and the proof is completed by multiplying  $-1$  on both sides of (31).  $\square$

From Lemma 7, we have

$$\tilde{p}_{\tau-1}(k) - \tilde{p}_\tau(k) \leq \tilde{p}_{\tau-1}(k) \frac{\delta_2 + \eta \min \{\delta_1, \tilde{l}_{\tau-1}(k)\}}{1 + \delta_2} \leq \tilde{p}_{\tau-1}(k) (\delta_2 + \eta \delta_1). \quad (32)$$

Hence, as long as  $1 - \delta_2 - \eta \delta_1 \geq 0$ , we can guarantee that (13) is satisfied.

## B.2 Proof of Lemma 2

**Lemma 8.** *The following inequality holds for any  $\tau$  and any  $k$*

$$\tilde{p}_\tau(k) - \tilde{p}_{\tau-1}(k) \leq \tilde{p}_\tau(k) \left[ 1 - I_\tau(k) \sum_{j=1}^K \tilde{p}_{\tau-1}(j) \left( 1 - \eta \min \{\delta_1, \tilde{l}_{\tau-1}(j)\} \right) \right] \quad (33)$$

where  $I_\tau(k) := \mathbb{1}(w_\tau(k) > \frac{\delta_2}{K})$ .

*Proof.* We first show that

$$\tilde{w}_\tau(k) \geq \tilde{p}_\tau(k) I_\tau(k) \sum_{j=1}^K \tilde{w}_\tau(j). \quad (34)$$

It is easy to see that inequality (34) holds when  $I_\tau(k) = 0$ . When  $I_\tau(k) = 1$ , we have  $w_\tau(k) = \tilde{w}_\tau(k) / (\sum_{j=1}^K \tilde{w}_\tau(j))$ . By (28), we have  $\tilde{p}_\tau(k) \leq w_\tau(k) = \tilde{w}_\tau(k) / (\sum_{j=1}^K \tilde{w}_\tau(j))$ , from which (34) holds. Then we have

$$\begin{aligned}
 \tilde{p}_\tau(k) - \tilde{p}_{\tau-1}(k) &\leq \tilde{p}_\tau(k) - \tilde{w}_\tau(k) \leq \tilde{p}_\tau(k) - \tilde{p}_\tau(k) I_\tau(k) \sum_{j=1}^K \tilde{w}_\tau(j) \\
 &= \tilde{p}_\tau(k) \left[ 1 - I_\tau(k) \sum_{j=1}^K \tilde{w}_\tau(j) \right] = \tilde{p}_\tau(k) \left\{ 1 - I_\tau(k) \sum_{j=1}^K \tilde{p}_{\tau-1}(j) \exp \left[ -\eta \min \{ \delta_1, \tilde{l}_{\tau-1}(j) \} \right] \right\} \\
 &\stackrel{(a)}{\leq} \tilde{p}_\tau(k) \left[ 1 - I_\tau(k) \sum_{j=1}^K \tilde{p}_{\tau-1}(j) \left( 1 - \eta \min \{ \delta_1, \tilde{l}_{\tau-1}(j) \} \right) \right]
 \end{aligned} \tag{35}$$

where in (a) we used  $e^{-x} \geq 1 - x$ .  $\square$

The proof of Lemma 2 builds on Lemma 8. First consider the case of  $I_\tau(k) = 0$ . In this case Lemma 8 becomes  $\tilde{p}_\tau(k) - \tilde{p}_{\tau-1}(k) \leq \tilde{p}_\tau(k)$ , which is trivial. On the other hand, since  $I_\tau(k) = 0$ , we have  $w_\tau(k) = \frac{\delta_2}{K}$ . Then leveraging (28), we have  $\tilde{p}_\tau(k) \leq w_\tau(k) = \frac{\delta_2}{K}$ . Plugging the lower bound of  $\tilde{p}_{\tau-1}(k)$  into (28), we have

$$\frac{\tilde{p}_\tau(k)}{\tilde{p}_{\tau-1}(k)} \leq \frac{\delta_2}{K} \frac{1}{\tilde{p}_{\tau-1}(k)} \leq \frac{\delta_2}{K} \frac{K(1 + \delta_2)}{\delta_2} = 1 + \delta_2. \tag{36}$$

Considering the case of  $I_\tau(k) = 1$ , Lemma 8 becomes

$$\begin{aligned}
 \tilde{p}_\tau(k) - \tilde{p}_{\tau-1}(k) &\leq \tilde{p}_\tau(k) \left[ 1 - \sum_{j=1}^K \tilde{p}_{\tau-1}(j) \left( 1 - \eta \min \{ \delta_1, \tilde{l}_{\tau-1}(j) \} \right) \right] \\
 &= \eta \tilde{p}_\tau(k) \sum_{j=1}^K \tilde{p}_{\tau-1}(j) \min \{ \delta_1, \tilde{l}_{\tau-1}(k) \} \leq \eta \tilde{p}_\tau(k) \delta_1.
 \end{aligned} \tag{37}$$

Rearranging (37) and combining it with (36), we complete the proof.

### B.3 Proof of Lemma 3

For conciseness, define  $\tilde{c}_\tau := \min \{ \tilde{l}_\tau, \delta_1 \cdot \mathbf{1} \}$ , and correspondingly  $\tilde{c}_\tau(k) := \min \{ \tilde{l}_\tau(k), \delta_1 \}$ . We further define  $\tilde{W}_\tau := \sum_{k=1}^K \tilde{w}_\tau(k)$ , and  $W_\tau := \sum_{k=1}^K w_\tau(k)$ . Leveraging these auxiliary variables, we have

$$\begin{aligned}
 \tilde{W}_{T+1} &= \sum_{k=1}^K \tilde{w}_{T+1}(k) = \sum_{k=1}^K \tilde{p}_T(k) \exp \left[ -\eta \tilde{c}_T(k) \right] = \sum_{k=1}^K \frac{w_T(k)}{W_T} \exp \left[ -\eta \tilde{c}_T(k) \right] \\
 &\geq \sum_{k=1}^K \frac{\tilde{w}_T(k)}{\tilde{W}_T} \frac{\exp \left[ -\eta \tilde{c}_T(k) \right]}{W_T} = \sum_{k=1}^K \tilde{p}_{T-1}(k) \frac{\exp \left[ -\eta \tilde{c}_T(k) - \eta \tilde{c}_{T-1}(k) \right]}{\tilde{W}_T W_T} \\
 &= \sum_{k=1}^K \frac{w_{T-1}(k)}{W_{T-1}} \frac{\exp \left[ -\eta \tilde{c}_T(k) - \eta \tilde{c}_{T-1}(k) \right]}{\tilde{W}_T W_T} \geq \dots \geq \sum_{k=1}^K \frac{\tilde{w}_1(k) \exp \left[ -\eta \sum_{\tau=1}^T \tilde{c}_\tau(k) \right]}{\prod_{\tau=1}^T (W_\tau \tilde{W}_\tau)}.
 \end{aligned} \tag{38}$$

Then, for any probability distribution  $\mathbf{p} \in \Delta_K$  noticing that the initialization of  $\tilde{w}_1(k) = 1, \forall k$  and hence  $\tilde{W}_1 = K$ , inequality (38) implies that

$$\sum_{k=1}^K p(k) \exp \left[ -\eta \sum_{\tau=1}^T \tilde{c}_\tau(k) \right] \leq \sum_{k=1}^K \exp \left[ -\eta \sum_{\tau=1}^T \tilde{c}_\tau(k) \right] \leq \tilde{W}_1 \prod_{\tau=1}^T (W_\tau \tilde{W}_{\tau+1}) \stackrel{(a)}{\leq} K(1 + \delta_2)^T \prod_{\tau=2}^{T+1} \tilde{W}_\tau, \tag{39}$$

where in (a) we used the fact that  $W_\tau \leq 1 + \delta_2$ . Then, using the the Jensen's inequality on  $e^{-x}$ , we have

$$\sum_{k=1}^K p(k) \exp \left[ -\eta \sum_{\tau=1}^T \tilde{c}_\tau(k) \right] \geq \exp \left[ -\eta \sum_{k=1}^K \sum_{\tau=1}^T p(k) \tilde{c}_\tau(k) \right]. \tag{40}$$

Plugging (40) into (39), we arrive at

$$\exp \left[ -\eta \sum_{k=1}^K \sum_{\tau=1}^T p(k) \tilde{c}_\tau(k) \right] \leq K(1 + \delta_2)^T \prod_{\tau=2}^{T+1} \tilde{W}_\tau. \tag{41}$$

On the other hand,  $\tilde{W}_\tau$  can be upper bounded by

$$\begin{aligned}
 \tilde{W}_\tau &= \sum_{k=1}^K \tilde{w}_\tau = \sum_{k=1}^K \tilde{p}_{\tau-1}(k) \exp[-\eta \tilde{c}_{\tau-1}(k)] \\
 &\stackrel{(b)}{\leq} \sum_{k=1}^K \tilde{p}_{\tau-1}(k) \left(1 - \eta \tilde{c}_{\tau-1}(k) + \frac{\eta^2}{2} [\tilde{c}_{\tau-1}(k)]^2\right) \\
 &= 1 - \eta \sum_{k=1}^K \tilde{p}_{\tau-1}(k) \tilde{c}_{\tau-1}(k) + \frac{\eta^2}{2} \sum_{k=1}^K \tilde{p}_{\tau-1}(k) [\tilde{c}_{\tau-1}(k)]^2
 \end{aligned} \tag{42}$$

where (b) follows from  $e^{-x} \leq 1 - x + x^2/2$ ,  $\forall x \geq 0$ . Taking logarithm on both sides of (42), we arrive at

$$\begin{aligned}
 \ln \tilde{W}_\tau &\leq \ln \left(1 - \eta \sum_{k=1}^K \tilde{p}_{\tau-1}(k) \tilde{c}_{\tau-1}(k) + \frac{\eta^2}{2} \sum_{k=1}^K \tilde{p}_{\tau-1}(k) [\tilde{c}_{\tau-1}(k)]^2\right) \\
 &\stackrel{(c)}{\leq} -\eta \sum_{k=1}^K \tilde{p}_{\tau-1}(k) \tilde{c}_{\tau-1}(k) + \frac{\eta^2}{2} \sum_{k=1}^K \tilde{p}_{\tau-1}(k) [\tilde{c}_{\tau-1}(k)]^2
 \end{aligned} \tag{43}$$

where (c) follows from  $\ln(1+x) \leq x$ . Then taking logarithm on both sides of (41) and plugging (43) in, we arrive at

$$-\eta \sum_{k=1}^K \sum_{\tau=1}^T p(k) \tilde{c}_\tau(k) \leq T \ln(1 + \delta_2) + \ln K - \eta \sum_{\tau=1}^T \sum_{k=1}^K \tilde{p}_\tau(k) \tilde{c}_\tau(k) + \frac{\eta^2}{2} \sum_{\tau=1}^T \sum_{k=1}^K \tilde{p}_\tau(k) [\tilde{c}_\tau(k)]^2. \tag{44}$$

Rearranging the terms of (44) and writing it compactly, we obtain

$$\begin{aligned}
 \sum_{\tau=1}^T (\tilde{\mathbf{p}}_\tau - \mathbf{p})^\top \tilde{\mathbf{c}}_\tau &\leq \frac{T \ln(1 + \delta_2) + \ln K}{\eta} + \frac{\eta}{2} \sum_{\tau=1}^T \sum_{k=1}^K \tilde{p}_\tau(k) [\tilde{c}_\tau(k)]^2 \\
 &\leq \frac{T \ln(1 + \delta_2) + \ln K}{\eta} + \frac{\eta}{2} \sum_{\tau=1}^T \sum_{k=1}^K \tilde{p}_\tau(k) [\tilde{l}_\tau(k)]^2.
 \end{aligned} \tag{45}$$

#### B.4 Proof of Theorem 1

To begin with, the instantaneous regret can be written as

$$\begin{aligned}
 \mathbf{p}_t^\top \mathbf{l}_t - \mathbf{p}^\top \mathbf{l}_t &= \sum_{k=1}^K p_t(k) l_t(k) - \sum_{k=1}^K p(k) l_t(k) \\
 &\stackrel{(a)}{=} \sum_{k=1}^K p_t(k) \mathbb{E}_{a_t} \left[ \frac{l_t(k) \mathbb{1}(a_t = k)}{p_t(k)} \right] - \sum_{k=1}^K p(k) \mathbb{E}_{a_t} \left[ \frac{l_t(k) \mathbb{1}(a_t = k)}{p_t(k)} \right] \\
 &= \sum_{k=1}^K (p_t(k) - p(k)) \mathbb{E}_{a_t} \left[ \frac{l_t(k) \mathbb{1}(a_t = k)}{p_{t+d_t}(k)} \frac{p_{t+d_t}(k)}{p_t(k)} \right] \\
 &\leq \max_k \frac{p_{t+d_t}(k)}{p_t(k)} \sum_{k=1}^K (p_t(k) - p(k)) \mathbb{E}_{a_t} \left[ \frac{l_t(k) \mathbb{1}(a_t = k)}{p_{t+d_t}(k)} \right] \\
 &\stackrel{(b)}{=} \left( \max_k \frac{p_{t+d_t}(k)}{p_t(k)} \right) \mathbb{E}_{a_t} \left[ \mathbf{p}_t^\top \hat{\mathbf{l}}_{t|t+d_t} - \mathbf{p}^\top \hat{\mathbf{l}}_{t|t+d_t} \right]
 \end{aligned} \tag{46}$$

where (a) is due to  $\mathbb{E}_{a_t} \left[ \frac{l_t(k) \mathbb{1}(a_t = k)}{p_t(k)} \right] = l_t(k)$ , and (b) follows from  $\hat{\mathbf{l}}_{t|t+d_t}(k) = \frac{l_t(k) \mathbb{1}(a_t = k)}{p_{t+d_t}(k)}$ .

Then the overall regret of  $T$  slots is given by

$$\begin{aligned}
 \text{Reg}_T &= \mathbb{E} \left[ \sum_{t=1}^T \mathbf{p}_t^\top \mathbf{l}_t \right] - \mathbf{p}^\top \mathbf{l}_t \leq \mathbb{E} \left[ \sum_{t=1}^T \left( \max_k \frac{p_{t+d_t}(k)}{p_t(k)} \right) \mathbb{E}_{a_t} \left[ \mathbf{p}_t^\top \hat{\mathbf{l}}_{t|t+d_t} - \mathbf{p}^\top \hat{\mathbf{l}}_{t|t+d_t} \right] \right] \\
 &\stackrel{(c)}{=} \mathbb{E} \left[ \sum_{\tau=1}^T \left( \max_k \frac{p_{t(\tau)+d_{t(\tau)}}(k)}{p_{t(\tau)}(k)} \right) \mathbb{E}_{a_{t(\tau)}} \left[ \mathbf{p}_{t(\tau)}^\top \hat{\mathbf{l}}_{t(\tau)|t(\tau)+d_{t(\tau)}} - \mathbf{p}^\top \hat{\mathbf{l}}_{t(\tau)|t(\tau)+d_{t(\tau)}} \right] \right] \\
 &\stackrel{(d)}{=} \mathbb{E} \left[ \sum_{\tau=1}^T \left( \max_k \frac{p_{t(\tau)+d_{t(\tau)}}(k)}{p_{t(\tau)}(k)} \right) \mathbb{E}_{a_{t(\tau)}} \left[ \mathbf{p}_{t(\tau)}^\top \tilde{\mathbf{l}}_\tau - \mathbf{p}^\top \tilde{\mathbf{l}}_\tau \right] \right] \\
 &\stackrel{(e)}{=} \mathbb{E} \left[ \sum_{\tau=1}^T \left( \max_k \frac{p_{t(\tau)+d_{t(\tau)}}(k)}{p_{t(\tau)}(k)} \right) \mathbb{E}_{a_{t(\tau)}} \left[ \tilde{\mathbf{p}}_{\tau-\tilde{s}_\tau}^\top \tilde{\mathbf{l}}_\tau - \mathbf{p}^\top \tilde{\mathbf{l}}_\tau \right] \right] \\
 &= \mathbb{E} \left[ \sum_{\tau=1}^T \left( \max_k \frac{p_{t(\tau)+d_{t(\tau)}}(k)}{p_{t(\tau)}(k)} \right) \left( \mathbb{E}_{a_{t(\tau)}} \left[ \tilde{\mathbf{p}}_{\tau-\tilde{s}_\tau}^\top \tilde{\mathbf{l}}_\tau - \tilde{\mathbf{p}}_\tau^\top \tilde{\mathbf{l}}_\tau \right] + \mathbb{E}_{a_{t(\tau)}} \left[ \tilde{\mathbf{p}}_\tau^\top \tilde{\mathbf{l}}_\tau - \mathbf{p}^\top \tilde{\mathbf{l}}_\tau \right] \right) \right] \quad (47)
 \end{aligned}$$

where (c) is due to the fact that  $\{t(1), t(2), \dots, t(T)\}$  is a permutation of  $\{1, 2, \dots, T\}$ ; (d) follows from  $\tilde{\mathbf{l}}_\tau = \hat{\mathbf{l}}_{t(\tau)|t(\tau)+d_{t(\tau)}}$ ; (e) uses the fact  $\mathbf{p}_t = \tilde{\mathbf{p}}_{L_{t-1}+1}$  and  $\mathbf{p}_{t(\tau)} = \tilde{\mathbf{p}}_{L_{t(\tau)-1}+1} = \tilde{\mathbf{p}}_{\tau-\tilde{s}_\tau}$ .

First note that between real time slot  $t(\tau)$  and  $t(\tau) + d_{t(\tau)}$ , there is at most  $\bar{d} + d_{t(\tau)} \leq 2\bar{d}$  feedback received. Hence the corresponding virtual slots will not differ larger than  $2\bar{d}$ . Note also that the index of virtual slot corresponding to  $t(\tau)$  must be no larger than that of  $t(\tau) + d_{t(\tau)}$ . Hence we have for all  $\tau \in [1, T]$ ,

$$\max_k \frac{p_{t(\tau)+d_{t(\tau)}}(k)}{p_{t(\tau)}(k)} \leq \left( \max_k \frac{\tilde{p}_{\tau+1}(k)}{\tilde{p}_\tau(k)} \right)^{2\bar{d}} \stackrel{(f)}{\leq} \max \left\{ (1 + \delta_2)^{2\bar{d}}, \frac{1}{(1 - \eta\delta_1)^{2\bar{d}}} \right\} \quad (48)$$

where (f) is the result of Lemma 2.

Then, to bound the terms in the second brackets of (47), again we denote  $\tilde{\mathbf{c}}_\tau := \min \{\tilde{\mathbf{l}}_\tau, \delta_1 \cdot \mathbf{1}\}$ , and correspondingly  $\tilde{c}_\tau(k) := \min \{\tilde{l}_\tau(k), \delta_1\}$  for conciseness. Then we have

$$\begin{aligned}
 \tilde{\mathbf{p}}_{\tau-\tilde{s}_\tau}^\top \tilde{\mathbf{c}}_\tau - \tilde{\mathbf{p}}_\tau^\top \tilde{\mathbf{c}}_\tau &= \tilde{\mathbf{c}}_\tau^\top (\tilde{\mathbf{p}}_{\tau-\tilde{s}_\tau} - \tilde{\mathbf{p}}_\tau) \stackrel{(g)}{=} \tilde{c}_\tau(m) \sum_{j=0}^{\tilde{s}_\tau-1} (\tilde{p}_{\tau-\tilde{s}_\tau+j}(m) - \tilde{p}_{\tau-\tilde{s}_\tau+j+1}(m)) \\
 &\stackrel{(h)}{\leq} \tilde{c}_\tau(m) \sum_{j=0}^{\tilde{s}_\tau-1} \tilde{p}_{\tau-\tilde{s}_\tau+j}(m) \frac{\delta_2 + \eta\tilde{c}_{\tau-\tilde{s}_\tau+j}(m)}{1 + \delta_2} \leq \tilde{c}_\tau(m) \sum_{j=0}^{\tilde{s}_\tau-1} (\eta\tilde{p}_{\tau-\tilde{s}_\tau+j}(m)\tilde{c}_{\tau-\tilde{s}_\tau+j}(m) + \delta_2) \\
 &\leq \tilde{l}_\tau(m) \sum_{j=0}^{\tilde{s}_\tau-1} (\eta\tilde{p}_{\tau-\tilde{s}_\tau+j}(m)\tilde{l}_{\tau-\tilde{s}_\tau+j}(m) + \delta_2) \quad (49)
 \end{aligned}$$

where (g) follows from the facts that  $\tilde{\mathbf{l}}_\tau$  has at most one entry (with index  $m$ ) being non-zero [cf. (59)] and  $\tilde{s}_\tau \geq 0$  [cf. Lemma 6]; and (h) is the result of Lemma 7. Then notice that

$$\tilde{l}_\tau(k)\tilde{p}_\tau(k) = \frac{l_{t(\tau)}(k)}{p_{t(\tau)+d_{t(\tau)}}(k)} \tilde{p}_\tau(k) \stackrel{(i)}{\leq} \left( \max_k \frac{\tilde{p}_\tau(k)}{\tilde{p}_{\tau+1}(k)} \right)^{2\bar{d}} \leq \frac{1}{(1 - \delta_2 - \eta\delta_1)^{2\bar{d}}} \quad (50)$$

where (i) uses the fact that between  $t(\tau)$  and  $t(\tau) + d_{t(\tau)}$  there is at most  $2\bar{d}$  feedback; then further applying the result of Lemma 1, inequality (50) can be obtained. Plugging (50) back in to (49) and taking expectation w.r.t.  $a_{t(\tau)}$ , we arrive at

$$\begin{aligned}
 \mathbb{E}_{a_{t(\tau)}} \left[ \tilde{\mathbf{p}}_{\tau-\tilde{s}_\tau}^\top \tilde{\mathbf{c}}_\tau - \tilde{\mathbf{p}}_\tau^\top \tilde{\mathbf{c}}_\tau \right] &\leq \left( \frac{\eta\tilde{s}_\tau}{(1 - \delta_2 - \eta\delta_1)^{2\bar{d}}} + \delta_2\tilde{s}_\tau \right) \sum_{k=1}^K p_{t(\tau)}(k)\tilde{l}_\tau(k) \\
 &\stackrel{(j)}{\leq} K \frac{1}{(1 - \delta_2 - \eta\delta_1)^{2\bar{d}}} \left( \frac{\eta\tilde{s}_\tau}{(1 - \delta_2 - \eta\delta_1)^{2\bar{d}}} + \delta_2\tilde{s}_\tau \right) \quad (51)
 \end{aligned}$$

where (j) follows a similar reason of (50). Then, noticing  $\sum_{\tau=1}^T \tilde{s}_\tau = \sum_{t=1}^T d_t = D$ , we have

$$\sum_{\tau=1}^T \mathbb{E}_{a_{t(\tau)}} \left[ \tilde{\mathbf{p}}_{\tau-\tilde{s}_\tau}^\top \tilde{\mathbf{c}}_\tau - \tilde{\mathbf{p}}_\tau^\top \tilde{\mathbf{c}}_\tau \right] \leq \frac{KD}{(1 - \delta_2 - \eta\delta_1)^{2\bar{d}}} \left( \frac{\eta}{(1 - \delta_2 - \eta\delta_1)^{2\bar{d}}} + \delta_2 \right). \quad (52)$$

Using a similar argument of (50), we can obtain

$$\mathbb{E}_{a_{t(\tau)}} \left[ \tilde{p}_\tau(k) [\tilde{l}_\tau(k)]^2 \right] = \tilde{p}_\tau(k) \frac{l_{t(\tau)}^2(k)}{p_{t(\tau)+d_t(\tau)}^2(k)} p_{t(\tau)}(k) \leq \frac{1}{(1 - \delta_2 - \eta\delta_1)^{4\bar{d}}} \quad (53)$$

Then leveraging Lemma 3, we arrive at

$$\begin{aligned} \sum_{\tau=1}^T \mathbb{E}_{a_{t(\tau)}} [(\tilde{\mathbf{p}}_\tau - \tilde{\mathbf{p}})^\top \tilde{\mathbf{c}}_\tau] &\leq \frac{T \ln(1 + \delta_2) + \ln K}{\eta} + \frac{\eta}{2} \sum_{\tau=1}^T \sum_{k=1}^K \mathbb{E}_{a_{t(\tau)}} \left[ \tilde{p}_\tau(k) [\tilde{l}_\tau(k)]^2 \right] \\ &\leq \frac{T \ln(1 + \delta_2) + \ln K}{\eta} + \frac{\eta KT}{2(1 - \delta_2 - \eta\delta_1)^{4\bar{d}}}. \end{aligned} \quad (54)$$

The last step is to show that introducing  $\delta_1$  will not incur too much extra regret. Note that both  $\tilde{\mathbf{c}}_\tau$  and  $\tilde{\mathbf{l}}_\tau$  have only one entry being non-zero, whose index is denoted by  $m_\tau$ . Notice that  $\tilde{l}_\tau(m_\tau) > \tilde{c}_\tau(m_\tau)$  only when  $\tilde{l}_\tau(m_\tau) = \frac{l_{t(\tau)}(m_\tau)}{p_{t(\tau)+d_t(\tau)}(m_\tau)} > \delta_1$ , which is equivalent to  $p_{t(\tau)+d_t(\tau)}(m_\tau) < l_{t(\tau)}(m_\tau)/\delta_1 \leq 1/\delta_1$ . Hence, we have

$$\begin{aligned} \sum_{\tau=1}^T \mathbb{E}_{a_{t(\tau)}} [(\tilde{\mathbf{p}}_\tau - \tilde{\mathbf{p}})^\top \tilde{\mathbf{l}}_\tau] &= \sum_{\tau=1}^T \mathbb{E}_{a_{t(\tau)}} [(\tilde{\mathbf{p}}_\tau - \tilde{\mathbf{p}})^\top \tilde{\mathbf{c}}_\tau] + \sum_{\tau=1}^T \mathbb{E}_{a_{t(\tau)}} [(\tilde{\mathbf{p}}_\tau - \tilde{\mathbf{p}})^\top (\tilde{\mathbf{l}}_\tau - \tilde{\mathbf{c}}_\tau)] \\ &\stackrel{(h)}{\leq} \sum_{\tau=1}^T \mathbb{E}_{a_{t(\tau)}} [(\tilde{\mathbf{p}}_\tau - \tilde{\mathbf{p}})^\top \tilde{\mathbf{c}}_\tau] + \sum_{\tau=1}^T \mathbb{E}_{a_{t(\tau)}} \left[ \tilde{p}_\tau(m_\tau) (\tilde{l}_\tau(m_\tau) - \tilde{c}_\tau(m_\tau)) \mathbf{1}(p_{t(\tau)+d_t(\tau)}(m_\tau) < 1/\delta_1) \right] \\ &\leq \sum_{\tau=1}^T \mathbb{E}_{a_{t(\tau)}} [(\tilde{\mathbf{p}}_\tau - \tilde{\mathbf{p}})^\top \tilde{\mathbf{c}}_\tau] + \sum_{\tau=1}^T \mathbb{E}_{a_{t(\tau)}} \left[ \tilde{p}_\tau(m_\tau) \tilde{l}_\tau(m_\tau) \mathbf{1}(p_{t(\tau)+d_t(\tau)}(m_\tau) < 1/\delta_1) \right] \end{aligned} \quad (55)$$

where in (h),  $m_\tau$  denotes the index of the only one non-zero entry of  $\tilde{\mathbf{l}}_\tau$ , and  $\tilde{\mathbf{p}}$  is dropped due to the appearance of the indicator function. To proceed, notice that

$$\begin{aligned} \mathbb{E}_{a_{t(\tau)}} \left[ \tilde{l}_\tau(m_\tau) \tilde{p}_\tau(m_\tau) \mathbf{1}(p_{t(\tau)+d_t(\tau)}(m_\tau) < 1/\delta_1) \right] &= \sum_{k=1}^K \frac{p_{t(\tau)}(k) l_{t(\tau)}(k)}{p_{t(\tau)+d_t(\tau)}(k)} \tilde{p}_\tau(k) \mathbf{1}(p_{t(\tau)+d_t(\tau)}(k) < 1/\delta_1) \\ &\stackrel{(i)}{\leq} \frac{\sum_{k=1}^K \tilde{p}_\tau(k) \mathbf{1}(p_{t(\tau)+d_t(\tau)}(k) < 1/\delta_1)}{(1 - \delta_2 - \eta\delta_1)^{2\bar{d}}} = \sum_{k=1}^K \frac{\tilde{p}_\tau(k)}{p_{t(\tau)+d_t(\tau)}(k)} \frac{p_{t(\tau)+d_t(\tau)}(k) \mathbf{1}(p_{t(\tau)+d_t(\tau)}(k) < 1/\delta_1)}{(1 - \delta_2 - \eta\delta_1)^{2\bar{d}}} \\ &\stackrel{(j)}{\leq} \frac{K}{\delta_1 (1 - \delta_2 - \eta\delta_1)^{4\bar{d}}} \end{aligned} \quad (56)$$

where in (i) we used the a similar argument of (50); and in (j) we used the fact  $x \mathbf{1}(x < a) \leq a$ .

Plugging (56) back into (55), we arrive at

$$\sum_{\tau=1}^T \mathbb{E}_{a_{t(\tau)}} [(\tilde{\mathbf{p}}_\tau - \tilde{\mathbf{p}})^\top \tilde{\mathbf{l}}_\tau] \leq \sum_{\tau=1}^T \mathbb{E}_{a_{t(\tau)}} [(\tilde{\mathbf{p}}_\tau - \tilde{\mathbf{p}})^\top \tilde{\mathbf{c}}_\tau] + \frac{KT}{\delta_1 (1 - \delta_2 - \eta\delta_1)^{4\bar{d}}} \quad (57)$$

Applying similar arguments as (55) and (56), we can also show that

$$\sum_{\tau=1}^T \mathbb{E}_{a_{t(\tau)}} [(\tilde{\mathbf{p}}_{\tau-\tilde{s}_\tau} - \tilde{\mathbf{p}}_\tau)^\top \tilde{\mathbf{l}}_\tau] \leq \sum_{\tau=1}^T \mathbb{E}_{a_{t(\tau)}} [(\tilde{\mathbf{p}}_{\tau-\tilde{s}_\tau} - \tilde{\mathbf{p}}_\tau)^\top \tilde{\mathbf{c}}_\tau] + \frac{KD}{\delta_1 (1 - \delta_2 - \eta\delta_1)^{6\bar{d}}}. \quad (58)$$

For the parameter selection, we have  $T \ln(1 + \delta_2) = T \ln(1 + \frac{1}{T+D}) \leq \ln e = 1$ . Leveraging the inequality that  $e \leq (1 - 2x)^{-2x} \leq 4, \forall x \in \mathbb{N}^+$ , we have that

$$\frac{1}{(1 - \eta\delta_1)^{2\bar{d}}} \leq \frac{1}{(1 - \delta_2 - \eta\delta_1)^{2\bar{d}}} = \mathcal{O}(1). \quad (59)$$

From (59) it is not hard to see the bound on (48), which is

$$\max_k \frac{p_{t(\tau)+d_t(\tau)}(k)}{p_{t(\tau)}(k)} \leq \max \left\{ (1 + \delta_2)^{2\bar{d}}, \frac{1}{(1 - \eta\delta_1)^{2\bar{d}}} \right\} = \mathcal{O}(1). \quad (60)$$

Then for (52), we have

$$\sum_{\tau=1}^T \mathbb{E}_{a_{t(\tau)}} [\tilde{\mathbf{p}}_{\tau-\tilde{s}_\tau}^\top \tilde{\mathbf{c}}_\tau - \tilde{\mathbf{p}}_\tau^\top \tilde{\mathbf{c}}_\tau] \leq \frac{KD}{(1-\delta_2-\eta\delta_1)^{2\bar{d}}} \left( \frac{\eta}{(1-\delta_2-\eta\delta_1)^{2\bar{d}}} + \delta_2 \right) = \mathcal{O}(\eta KD + \delta_2 KD). \quad (61)$$

For (54), we have

$$\sum_{\tau=1}^T \mathbb{E}_{a_{t(\tau)}} [(\tilde{\mathbf{p}}_\tau - \tilde{\mathbf{p}})^\top \tilde{\mathbf{c}}_\tau] \leq \frac{T \ln(1+\delta_2) + \ln K}{\eta} + \frac{\eta KT}{2(1-\delta_2-\eta\delta_1)^{4\bar{d}}} = \mathcal{O}\left(\eta KT + \frac{1+\ln K}{\eta}\right). \quad (62)$$

Using (62) and the selection of  $\delta_1$ , we can bound (57) by

$$\sum_{\tau=1}^T \mathbb{E}_{a_{t(\tau)}} [(\tilde{\mathbf{p}}_\tau - \tilde{\mathbf{p}})^\top \tilde{\mathbf{l}}_\tau] \leq \sum_{\tau=1}^T \mathbb{E}_{a_{t(\tau)}} [(\tilde{\mathbf{p}}_\tau - \tilde{\mathbf{p}})^\top \tilde{\mathbf{c}}_\tau] + \frac{KT}{\delta_1(1-\delta_2-\eta\delta_1)^{4\bar{d}}} = \mathcal{O}\left(\eta KT + \frac{1+\ln K}{\eta}\right). \quad (63)$$

Using (61) and the selection of  $\delta_1$ , we have

$$\sum_{\tau=1}^T \mathbb{E}_{a_{t(\tau)}} [(\tilde{\mathbf{p}}_{\tau-\tilde{s}_\tau} - \tilde{\mathbf{p}}_\tau)^\top \tilde{\mathbf{l}}_\tau] \leq \sum_{\tau=1}^T \mathbb{E}_{a_{t(\tau)}} [(\tilde{\mathbf{p}}_{\tau-\tilde{s}_\tau} - \tilde{\mathbf{p}}_\tau)^\top \tilde{\mathbf{c}}_\tau] + \frac{KD}{\delta_1(1-\delta_2-\eta\delta_1)^{6\bar{d}}} = \mathcal{O}(\eta KD + \delta_2 KD). \quad (64)$$

Plugging (60), (63), and (64) into (47), the regret is bounded by

$$\text{Reg}_T = \sum_{t=1}^T \mathbb{E}[\mathbf{p}_t^\top \mathbf{l}_t] - \sum_{t=1}^T \mathbf{p}^{*\top} \mathbf{l}_t = \mathcal{O}(\sqrt{(T+D)K(1+\ln K)}). \quad (65)$$

## C Proofs for DBGD

### C.1 Proof of Lemma 4

Since  $f_{s|t}(\cdot)$  is  $L$ -Lipschitz, we have  $g_{s|t}(k) \leq \frac{1}{\delta} L \|\delta \mathbf{e}_k\| = L$ , and thus  $\|g_{s|t}\| \leq \sqrt{KL}$ . On the other hand, let  $\nabla_{s|t} := \nabla f_{s|t}(\mathbf{x}_{s|t})$ , and  $\nabla_{s|t}(k)$  being the  $k$ -th entry of  $\nabla_{s|t}$ . Due to the  $\beta$ -smoothness of  $f_{s|t}(\cdot)$ , we have

$$g_{s|t}(k) - \nabla_{s|t}(k) \leq \frac{1}{\delta} (\delta \nabla_{s|t}^\top \mathbf{e}_k + \frac{\beta}{2} \delta^2) - \nabla_{s|t}(k) = \frac{\beta \delta}{2} \quad (66)$$

suggesting that  $\|g_{s|t} - \nabla f_{s|t}(\mathbf{x}_{s|t})\| \leq \frac{\beta \delta}{2} \sqrt{KL}$ .

### C.2 Proof of Lemma 5

**Lemma 5** (Restate). *In virtual slots, it is guaranteed to have*

$$\|\tilde{\mathbf{x}}_\tau - \tilde{\mathbf{x}}_{\tau-\tilde{s}_\tau}\| \leq \eta \tilde{s}_\tau \sqrt{KL} \quad (67)$$

and for any  $\mathbf{x} \in \mathcal{X}_\delta$ , we have

$$\eta \tilde{\mathbf{g}}_\tau^\top (\tilde{\mathbf{x}}_\tau - \mathbf{x}) \leq \frac{\eta^2}{2} KL^2 + \frac{\|\tilde{\mathbf{x}}_\tau - \mathbf{x}\|^2 - \|\tilde{\mathbf{x}}_{\tau+1} - \mathbf{x}\|^2}{2}. \quad (68)$$

*Proof.* The proof begins with

$$\|\tilde{\mathbf{x}}_{\tau-\tilde{s}_\tau} - \tilde{\mathbf{x}}_\tau\| \leq \sum_{j=0}^{\tilde{s}_\tau-1} \|\tilde{\mathbf{x}}_{\tau-\tilde{s}_\tau+j} - \tilde{\mathbf{x}}_{\tau-\tilde{s}_\tau+j+1}\| \stackrel{(a)}{\leq} \eta \tilde{s}_\tau \sqrt{KL} \quad (69)$$

where (a) uses the fact that  $\|\tilde{\mathbf{x}}_\tau - \tilde{\mathbf{x}}_{\tau+1}\| = \|\tilde{\mathbf{x}}_\tau - \Pi_{\mathcal{X}_\delta}[\tilde{\mathbf{x}}_\tau - \eta \tilde{\mathbf{g}}_\tau]\| \leq \eta \|\tilde{\mathbf{g}}_\tau\|$ . The first inequality is thus proved

Then, notice that

$$\begin{aligned} \|\tilde{\mathbf{x}}_{\tau+1} - \mathbf{x}\|^2 - \|\tilde{\mathbf{x}}_\tau - \mathbf{x}\|^2 &= \|\Pi_{\mathcal{X}_\delta}[\tilde{\mathbf{x}}_\tau - \eta \tilde{\mathbf{g}}_\tau] - \mathbf{x}\|^2 - \|\tilde{\mathbf{x}}_\tau - \mathbf{x}\|^2 \\ &\stackrel{(b)}{\leq} \|\tilde{\mathbf{x}}_\tau - \mathbf{x} - \eta \tilde{\mathbf{g}}_\tau\|^2 - \|\tilde{\mathbf{x}}_\tau - \mathbf{x}\|^2 = -2\eta \tilde{\mathbf{g}}_\tau^\top (\tilde{\mathbf{x}}_\tau - \mathbf{x}) + \eta^2 \|\tilde{\mathbf{g}}_\tau\|^2 \end{aligned} \quad (70)$$

where inequality (b) uses the non-expansion property of projection. Rearranging the terms of (70) completes the proof.  $\square$

### C.3 Proof of Theorem 2

**Lemma 9.** Let  $h_t(\mathbf{x}) := f_t(\mathbf{x}) + (\mathbf{g}_t - \nabla f_t(\mathbf{x}_t))^\top \mathbf{x}$ , where  $\mathbf{g}_t := \mathbf{g}_{t|t+d_t}$ . Then  $h_t(\mathbf{x})$  has the following properties: i)  $h_t(\mathbf{x})$  is  $(L + \frac{\beta\delta\sqrt{K}}{2})$ -Lipschitz; and ii)  $h_t(\mathbf{x})$  is  $\beta$  smooth and convex.

*Proof.* Starting with the first property, consider that

$$\begin{aligned} \|h_t(\mathbf{x}) - h_t(\mathbf{y})\| &= \|f_t(\mathbf{x}) + (\mathbf{g}_t - \nabla f_t(\mathbf{x}_t))^\top \mathbf{x} - f_t(\mathbf{y}) - (\mathbf{g}_t - \nabla f_t(\mathbf{x}_t))^\top \mathbf{y}\| \\ &\leq \|f_t(\mathbf{x}) - f_t(\mathbf{y})\| + \|\mathbf{g}_t - \nabla f_t(\mathbf{x}_t)\| \|\mathbf{x} - \mathbf{y}\| \stackrel{(a)}{\leq} \left(L + \frac{\beta\delta\sqrt{K}}{2}\right) \|\mathbf{x} - \mathbf{y}\| \end{aligned} \quad (71)$$

where in (a) we used the results in Lemma 4. For the second property, the convexity of  $h_t(\mathbf{x})$  is obvious. Then noticing that  $\nabla h_t(\mathbf{x}) = \nabla f_t(\mathbf{x}) + \mathbf{g}_t - \nabla f_t(\mathbf{x}_t)$ , we have

$$\begin{aligned} h_t(\mathbf{y}) - h_t(\mathbf{x}) &= f_t(\mathbf{y}) - f_t(\mathbf{x}) + (\mathbf{g}_t - \nabla f_t(\mathbf{x}_t))^\top (\mathbf{y} - \mathbf{x}) \\ &\leq (\nabla f_t(\mathbf{x}))^\top (\mathbf{y} - \mathbf{x}) + \frac{\beta}{2} \|\mathbf{y} - \mathbf{x}\|^2 + (\mathbf{g}_t - \nabla f_t(\mathbf{x}_t))^\top (\mathbf{y} - \mathbf{x}) \\ &= (\nabla h_t(\mathbf{x}))^\top (\mathbf{y} - \mathbf{x}) + \frac{\beta}{2} \|\mathbf{y} - \mathbf{x}\|^2 \end{aligned} \quad (72)$$

which implies that  $h_t(\mathbf{x})$  is  $\beta$  smooth.  $\square$

Then we are ready to prove Theorem 2. Let  $h_t(\mathbf{x}) := f_t(\mathbf{x}) + (\mathbf{g}_t - \nabla f_t(\mathbf{x}_t))^\top \mathbf{x}$ , where  $\mathbf{g}_t := \mathbf{g}_{t|t+d_t}$ . Using the property of  $h_t(\mathbf{x})$  in Lemma 9 as well as the fact  $\nabla h_t(\mathbf{x}_t) = \mathbf{g}_t$ , we have

$$\begin{aligned} \text{Reg}_T &= \sum_{t=1}^T f_t(\mathbf{x}_t) - \sum_{t=1}^T f_t(\mathbf{x}^*) \\ &= \sum_{t=1}^T \left( h_t(\mathbf{x}_t) - (\mathbf{g}_t - \nabla f_t(\mathbf{x}_t))^\top \mathbf{x}_t \right) - \sum_{t=1}^T \left( h_t(\mathbf{x}^*) - (\mathbf{g}_t - \nabla f_t(\mathbf{x}_t))^\top \mathbf{x}^* \right) \\ &= \sum_{t=1}^T \left( h_t(\mathbf{x}_t) - h_t(\mathbf{x}^*) \right) + \sum_{t=1}^T (\mathbf{g}_t - \nabla f_t(\mathbf{x}_t))^\top (\mathbf{x}^* - \mathbf{x}_t) \\ &\stackrel{(a)}{\leq} \sum_{t=1}^T \left( h_t(\mathbf{x}_t) - h_t(\mathbf{x}_\delta) \right) + \sum_{t=1}^T \left( h_t(\mathbf{x}_\delta) - h_t(\mathbf{x}) \right) + \frac{RT\beta\delta\sqrt{K}}{2} \\ &\stackrel{(b)}{\leq} \sum_{t=1}^T \left( h_t(\mathbf{x}_t) - h_t(\mathbf{x}_\delta) \right) + \delta RT \left( L + \frac{\beta\delta\sqrt{K}}{2} \right) + \frac{RT\beta\delta\sqrt{K}}{2} \end{aligned} \quad (73)$$

where in (a)  $\mathbf{x}_\delta := \Pi_{\mathcal{X}_\delta}(\mathbf{x}^*)$ , and the inequality follows from the results in Lemma 4; (b) follows from the fact that  $h_t(\cdot)$  is  $(L + \frac{\beta\delta\sqrt{K}}{2})$ -Lipschitz, as well as  $\|\mathbf{x}_\delta - \mathbf{x}\| \leq \delta R$ .

Hence, at virtual slots, it is like learning according to  $h_t(\mathbf{x}_t)$ , with  $\nabla h_t(\mathbf{x}_t)$  being revealed. With the short-hand notation  $\tilde{h}_\tau(\cdot) := h_{t(\tau)}(\cdot)$ , we have (using similar arguments like the proof of Theorem 1)

$$\begin{aligned} \sum_{t=1}^T h_t(\mathbf{x}_t) - \sum_{t=1}^T h_t(\mathbf{x}_\delta) &= \sum_{\tau=1}^T h_{t(\tau)}(\mathbf{x}_{t(\tau)}) - \sum_{\tau=1}^T h_{t(\tau)}(\mathbf{x}_\delta) = \sum_{\tau=1}^T \tilde{h}_\tau(\tilde{\mathbf{x}}_{\tau-\tilde{s}_\tau}) - \sum_{\tau=1}^T \tilde{h}_\tau(\mathbf{x}_\delta) \\ &= \sum_{\tau=1}^T \tilde{h}_\tau(\tilde{\mathbf{x}}_{\tau-\tilde{s}_\tau}) - \sum_{\tau=1}^T \tilde{h}_\tau(\tilde{\mathbf{x}}_\tau) + \sum_{\tau=1}^T \tilde{h}_\tau(\tilde{\mathbf{x}}_\tau) - \sum_{\tau=1}^T \tilde{h}_\tau(\mathbf{x}_\delta). \end{aligned} \quad (74)$$

The first term in the RHS of (74) can be bounded as

$$\tilde{h}_\tau(\tilde{\mathbf{x}}_{\tau-\tilde{s}_\tau}) - \tilde{h}_\tau(\tilde{\mathbf{x}}_\tau) \leq \|\tilde{h}_\tau(\tilde{\mathbf{x}}_{\tau-\tilde{s}_\tau}) - \tilde{h}_\tau(\tilde{\mathbf{x}}_\tau)\| \stackrel{(c)}{\leq} \left(L + \frac{\beta\delta\sqrt{K}}{2}\right) \|\tilde{\mathbf{x}}_{\tau-\tilde{s}_\tau} - \tilde{\mathbf{x}}_\tau\| \stackrel{(d)}{\leq} \eta \tilde{s}_\tau \sqrt{K} L \left(L + \frac{\beta\delta\sqrt{K}}{2}\right) \quad (75)$$

where (c) follows from Lemma 9; and (d) is the result of Lemma 5. Hence, using  $\sum_{\tau=1}^T \tilde{s}_\tau = D$  in Lemma 6, we obtain

$$\sum_{\tau=1}^T \tilde{h}_\tau(\tilde{\mathbf{x}}_{\tau-\tilde{s}_\tau}) - \sum_{\tau=1}^T \tilde{h}_\tau(\tilde{\mathbf{x}}_\tau) \leq \eta D \sqrt{K} L \left(L + \frac{\beta\delta\sqrt{K}}{2}\right). \quad (76)$$



On the other hand, by the convexity of  $\tilde{h}_\tau(\cdot)$ , we have

$$\begin{aligned} \tilde{h}_\tau(\tilde{\mathbf{x}}_\tau) - \tilde{h}_\tau(\mathbf{x}_\delta) &\leq (\nabla \tilde{h}_\tau(\tilde{\mathbf{x}}_\tau))^\top (\tilde{\mathbf{x}}_\tau - \mathbf{x}_\delta) = [\nabla \tilde{h}_\tau(\tilde{\mathbf{x}}_\tau) - \tilde{\mathbf{g}}_\tau]^\top (\tilde{\mathbf{x}}_\tau - \mathbf{x}_\delta) + \tilde{\mathbf{g}}_\tau^\top (\tilde{\mathbf{x}}_\tau - \mathbf{x}_\delta) \\ &\stackrel{(e)}{\leq} \beta \|\tilde{\mathbf{x}}_\tau - \tilde{\mathbf{x}}_{\tau-\tilde{s}_\tau}\| \|\tilde{\mathbf{x}}_\tau - \mathbf{x}_\delta\| + \tilde{\mathbf{g}}_\tau^\top (\tilde{\mathbf{x}}_\tau - \mathbf{x}_\delta) \leq \beta R \|\tilde{\mathbf{x}}_\tau - \tilde{\mathbf{x}}_{\tau-\tilde{s}_\tau}\| + \tilde{\mathbf{g}}_\tau^\top (\tilde{\mathbf{x}}_\tau - \mathbf{x}_\delta) \end{aligned} \quad (77)$$

where (e) is because  $\tilde{h}_\tau(\cdot)$  is  $\beta$ -smoothness [cf. (Nesterov, 2013, Thm 2.1.5)]. Taking summation over  $\tau$  and leveraging the results in Lemma 5, we have

$$\sum_{\tau=1}^T \tilde{h}_\tau(\tilde{\mathbf{x}}_\tau) - \tilde{h}_\tau(\mathbf{x}_\delta) \leq \sum_{\tau=1}^T \eta \tilde{s}_\tau \sqrt{KL} \beta R + \sum_{\tau=1}^T \frac{\eta}{2} \|\tilde{\mathbf{g}}_\tau\|^2 + \frac{R^2}{\eta} \leq \eta D \sqrt{KL} \beta R + \frac{\eta T}{2} KL^2 + \frac{R^2}{\eta}. \quad (78)$$

Selecting  $\delta = \mathcal{O}(1/(T+D))$ , (76) implies

$$\sum_{\tau=1}^T \tilde{h}_\tau(\tilde{\mathbf{x}}_{\tau-\tilde{s}_\tau}) - \sum_{\tau=1}^T \tilde{h}_\tau(\tilde{\mathbf{x}}_\tau) \leq \eta D \sqrt{KL} \left( L + \frac{\beta \delta \sqrt{K}}{2} \right) = \mathcal{O}(\eta \sqrt{KD}). \quad (79)$$

Inequality (78) then becomes

$$\sum_{\tau=1}^T \tilde{h}_\tau(\tilde{\mathbf{x}}_\tau) - \tilde{h}_\tau(\mathbf{x}_\delta) \leq \eta D \sqrt{KL} \beta R + \frac{\eta T}{2} KL^2 + \frac{R^2}{\eta} = \mathcal{O}\left(\eta KT + \eta \sqrt{KD} + \frac{1}{\eta}\right). \quad (80)$$

Plugging (74), (76), and (78) into (73), and choosing  $\eta = \mathcal{O}(1/\sqrt{K(T+D)})$ , the proof is complete.

#### C.4 Proof of Corollary 1

To prove Corollary 1, we will show that

$$\frac{1}{K+1} \sum_{t=1}^T \sum_{k=0}^K f_t(\mathbf{x}_{t,k}) - \sum_{t=1}^T f_t(\mathbf{x}_t) = \mathcal{O}(\sqrt{K}). \quad (81)$$

Using the  $\beta$ -smoothness in Assumption 4, we have for any  $k \neq 0$

$$f_t(\mathbf{x}_{t,k}) - f_t(\mathbf{x}_t) \leq (\nabla f_t(\mathbf{x}_t))^\top (\mathbf{x}_{t,k} - \mathbf{x}_t) + \frac{\beta \delta^2}{2} \leq \delta \|\nabla f_t(\mathbf{x}_t)\| + \frac{\beta \delta^2}{2}. \quad (82)$$

Then leveraging the result of Lemma 4, we have

$$\begin{aligned} \|\nabla f_t(\mathbf{x}_t)\| &= \|\nabla f_{|t+d_t}(\mathbf{x}_{|t+d_t})\| = \|\nabla f_{|t+d_t}(\mathbf{x}_{|t+d_t}) + \mathbf{g}_{|t+d_t} - \mathbf{g}_{|t+d_t}\| \\ &\leq \|\mathbf{g}_{|t+d_t}\| + \|\nabla f_{|t+d_t}(\mathbf{x}_{|t+d_t}) - \mathbf{g}_{|t+d_t}\| \leq \sqrt{KL} + \frac{\beta \delta \sqrt{K}}{2}. \end{aligned} \quad (83)$$

Plugging (83) back to (82), we have

$$f_t(\mathbf{x}_{t,k}) - f_t(\mathbf{x}_t) \leq \delta \sqrt{KL} + \frac{\beta \delta^2 \sqrt{K}}{2} + \frac{\beta \delta^2}{2} \stackrel{(a)}{=} \mathcal{O}\left(\frac{\sqrt{K}}{T+D}\right) \quad (84)$$

where (a) follows from  $\delta = \mathcal{O}((T+D)^{-1})$ . Summing over  $k$  and  $t$  readily implies (81).
